# Supplementary material for: Solution-phase automated synthesis of an α-amino aldehyde as a versatile intermediate
Source: publisher site journal article supplement (doi:10.3762/bjoc.13.13), 2017-01-17
Supplement: Additional file 1 [file 1860-5397-13-13-S1.pdf]

# Supporting Information

for

## **Solution-phase automated synthesis of an $\alpha$ -amino aldehyde as a versatile intermediate**

Hisashi Masui<sup>1</sup>, Sae Yosugi<sup>1</sup>, Shinichiro Fuse<sup>2</sup> and Takashi Takahashi\*<sup>1</sup>

Address: <sup>1</sup>Yokohama University of Pharmacy, 601 Matano-cho, Totsuka-ku, Yokohama 245-0066, Japan, and <sup>2</sup>Laboratory for Chemistry and Life Science, Institute of Innovative Research, Tokyo Institute of Technology, 4259 Nagatsuta-cho, Midori-ku, Yokohama 226-8503, Japan

Email: Takashi Takahashi - [ttak@hamayaku.ac.jp](mailto:ttak@hamayaku.ac.jp)

\* Corresponding author

**Synthetic procedures and <sup>1</sup>H NMR spectral data of compounds**

**2a–c, 3a–c, and 4a–c**

# Experimental

## General

NMR spectra were recorded on a JEOL Model ECA-500 instrument. Chemical shifts are reported in parts per million (ppm) relative to the signal for the internal standard tetramethylsilane (0.0 ppm) or the solvent  $\text{CDCl}_3$  (7.26 ppm,  $^1\text{H}$  NMR; or 77.1 ppm,  $^{13}\text{C}$  NMR) peaks. Data for  $^1\text{H}$  NMR spectra are reported as follows: chemical shift ( $\delta$  ppm), multiplicity, coupling constant (Hz), and integration.  $^{13}\text{C}$  NMR spectrum data are reported as follows: chemical shift ( $\delta$  ppm), and where applicable, multiplicity and coupling constants. Multiplicities are reported using the following abbreviations: s, singlet; d, doublet; t, triplet; q, quartet; sp, septet; m, multiplet; br, broad; and J, coupling constants in hertz. Only the strongest and/or structurally relevant IR peaks are reported ( $\text{cm}^{-1}$ ). All reactions were monitored by thin-layer chromatography performed using 0.2 mm E. Merck silica gel plate (60F-254). The reactants and products were visualized using UV light (254 nm), or by heating after treatment with *p*-anisaldehyde solution, ceric sulfate solution, ninhydrin solution, or 10% ethanoic phosphomolybdic acid. Column chromatography separations were performed using silica gel (Merck).

## Methyl (*tert*-butoxycarbonyl)-L-serinate (2a)

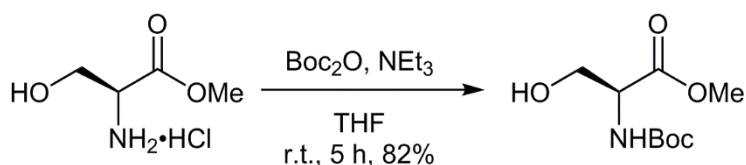

START

RR2-RF1  
STIR-RF1  
RR3-RF1  
RR1-RF1  
RR4-RR1-RF1  
WAIT(Min) (Wait 300 min)  
RS2-RF1  
WAIT(Min) (Wait 3 min)  
STIROFF-RF1  
RS1-RF1  
SEP-RF1 (UP)  
SF1-RF1  
RS1-RF1  
SEP-RF1(UP)  
SF2-SF  
RS3-RF1  
SEP-RF1(UP)  
SF2-DT1-CF1  
END

The reagents, washings and solvents were placed in each reservoirs and bottles as described below.

RF1 methyl L-serinate hydrochloride (2.00 g, 12.9 mmol)

RR1  $\text{Boc}_2\text{O}$  (3.38 g, 15.5 mmol) in 11.0 mL of THF

RR2 THF (50.0 mL)

RR3 Et<sub>3</sub>N (5.36 mL, 38.7 mmol)

RR4 THF 5.00 mL

RS1 EtOAc 120 mL

RS2 HCl (1 M aqueous) 60.0 mL

RS3 NaCl (10% aqueous) 80.0 mL

DT1 Na<sub>2</sub>SO<sub>4</sub>

To a solution of methyl L-serinate hydrochloride (**1**, 2.00 g, 12.9 mmol, 1.00 equiv., RF1) in THF (50.0 mL, RR2) were added Et<sub>3</sub>N (5.36 mL, 38.7 mmol, 3.00 equiv, RR3) and Boc<sub>2</sub>O (3.38 g, 15.5 mmol, 1.20 equiv, RR1) in THF (11.0 mL, RR1) diluted with THF (5.00 mL, RR4) and transferred to RF1 at 25 °C. After being stirred at the same temperature for 5 h, the reaction mixture (RF1) was quenched with 1 M HCl aq. (RS2) and the aqueous layer was extracted with two portions of ethyl acetate (RS1). The combined organic layer was washed with 10% NaCl aq. (RS3), dried over Na<sub>2</sub>SO<sub>4</sub> (DT1), filtered, and concentrated in vacuo. The residue was purified by column chromatography on silica gel (50% ethyl acetate in hexane) to give methyl (*tert*-butoxycarbonyl)-L-serinate (2.31 g, 10.5 mmol, 82%) as a colorless oil.

<sup>1</sup>H NMR (500 MHz, CDCl<sub>3</sub>) δ 5.43 (s, 1H), 4.39 (s, 1H), 3.98 (dd, *J* = 4.0 Hz, 11.5 Hz, 1H), 3.93 (dd, *J* = 3.5 Hz, 11.5 Hz, 1H), 3.79 (s, 3H), 1.45 (s, 9H).

**3-(*tert*-Butyl) 4-methyl (*S*)-2,2-dimethyloxazolidine-3,4-dicarboxylate (3a)**

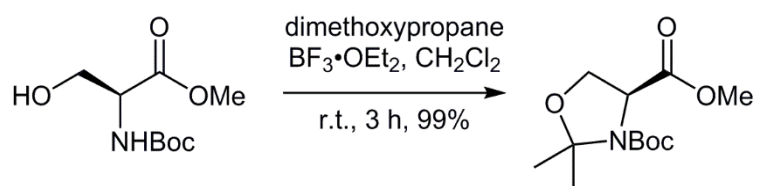

START

STIR-RF1

RR1-RF1

RR4-RR1-RF1

RR3-RF1

RR6-RR3-RF1

WAIT(Min) (Wait 360 min)

STIROFF-RF1

RF1-SF

SF-SF2

RR2-RF1

SF2-RF1

STIR-RF1

WAIT(Min) (Wait 5 min)

STIROFF-RF1

RS1-RF1

SEP-RF1(UP)

SF1-RF1

RS1-RF1

SEP-RF1(UP)

SF2-SF

RS3-RF1

SEP-RF1(UP)

SF2-DT2-CF1

END

The reagents, washings and solvents were placed in each reservoirs and bottles as described below.

RF1 methyl (*tert*-butoxycarbonyl)-L-serinate (**2a**, 1.94 g, 8.85 mmol) in 20.0 mL of CH<sub>2</sub>Cl<sub>2</sub>

RR1 2,2-dimethoxypropane (3.25 mL, 26.6 mmol) in 15.0 mL of CH<sub>2</sub>Cl<sub>2</sub>

RR2 NaOH (10% aqueous) 60.0 mL

RR3 BF<sub>3</sub>·OEt<sub>2</sub> (0.0556 mL, 0.443 mmol) in 15.0 mL of CH<sub>2</sub>Cl<sub>2</sub>

RR4 CH<sub>2</sub>Cl<sub>2</sub> 10.0 mL

RR6 CH<sub>2</sub>Cl<sub>2</sub> 10.0 mL

RS1 EtOAc 160 mL

RS3 NaCl (10% aqueous) 80.0 mL

DT2 Na<sub>2</sub>SO<sub>4</sub>

To a solution of methyl (*tert*-butoxycarbonyl)-L-serinate (**2a**, 1.94 g, 8.85 mmol, 1.00 equiv, RF1) in CH<sub>2</sub>Cl<sub>2</sub> (20.0 mL, RF1) were added 2,2-dimethoxypropane (3.25 mL, 26.6 mmol, 3.00 equiv, RR1) in CH<sub>2</sub>Cl<sub>2</sub> (15.0 mL, RR1) diluted with CH<sub>2</sub>Cl<sub>2</sub> (10.0 mL, RR4) and boron trifluoride-ethyl ether complex (0.0553 mL, 0.443 mmol, 0.500 equiv, RR3) in CH<sub>2</sub>Cl<sub>2</sub> (15.0 mL, RR3) diluted with CH<sub>2</sub>Cl<sub>2</sub> (10.0 mL, RR6) and transferred to RF1 at 25 °C. After being stirred at the same

temperature for 3 h, the reaction mixture (RF1) was quenched with saturated NaOH aq. (RR2) and the aqueous layer was extracted with two portions of ethyl acetate (RS1). The combined organic layer was washed with 10% NaCl aq. (RS3), dried over Na<sub>2</sub>SO<sub>4</sub> (DT2), filtered, and concentrated in vacuo. The residue was purified by column chromatography on silica gel (16% ethyl acetate in hexane) to give 3-(*tert*-butyl) 4-methyl (*S*)-2,2-dimethyloxazolidine-3,4-dicarboxylate (2.28 g, 8.79 mmol, 99%) as a colorless oil.

<sup>1</sup>H NMR (500 MHz, CDCl<sub>3</sub>) δ 4.49 (dd, *J* = 2.5 Hz, 7.0 Hz, 1H), 4.38 (dd, *J* = 3.0 Hz, 7.0 Hz, 1H), 4.16-4.12 (m, 1H), 4.04-4.02 (m, 1H), 3.75 (s, 3H), 1.67-1.41 (m, 15H).

***tert*-Butyl (*R*)-4-(hydroxymethyl)-2,2-dimethyloxazolidine-3-carboxylate**

**(4a)**

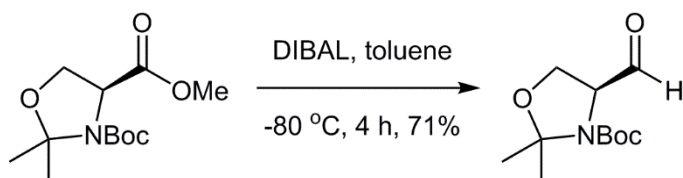

START

STIR-RF1

RR2-RF1

WAIT(Min) (Wait 240 min)

RS2-RF1

RS1-RF1

WAIT(Min) (Wait 60 min)

STIROFF-RF1

SEP-RF1(UP)

SF1-RF1

RS1-RF1

SEP-RF1(UP)

SF2-SF

RS3-RF1

SEP-RF1(UP)

SF2-DT1-CF1

END

The reagents, washings and solvents were placed in each reservoirs and bottles as described below.

RF1 3-(*tert*-butyl) 4-methyl (S)-2,2-dimethyloxazolidine-3,4-dicarboxylate (1.00 g, 3.86 mmol, 1.00 equiv, RF1) in 50.0 mL of toluene

RR2 Diisobutylaluminum Hydride (7.72 mL, 7.72 mmol, 2.00 equiv)

RS1 EtOAc 160 mL

RS2 Rochelle salt (10% aqueous) 60.0 mL

RS3 NaCl (10% aqueous) 80.0 mL

DT1 Na<sub>2</sub>SO<sub>4</sub>

To a solution of 3-(*tert*-butyl) 4-methyl (S)-2,2-dimethyloxazolidine-3,4-dicarboxylate (1.00 g, 3.86 mmol, 1.00 equiv, RF1) in toluene (50.0 mL, RF1) were added DIBAL (7.72 mL, 7.72 mmol, 2.00 equiv, RR2) and transferred to RF1 at -80 °C. After being stirred at the same temperature for 4 h, the reaction mixture was quenched with saturated aqueous Rochelle salt and the aqueous



layer (RS2) at 25 °C. After being stirred at the same temperature for 1 h, the reaction mixture was extracted with two portions of ethyl acetate (RS1). The combined organic layer was washed with 10% NaCl aq. (RS3), dried over Na<sub>2</sub>SO<sub>4</sub> (DT1), filtered, and concentrated in vacuo. The residue was purified by column chromatography on silica gel (25% ethyl acetate in hexane) to give *tert*-butyl (*R*)-4-(hydroxymethyl)-2,2-dimethyloxazolidine-3-carboxylate (0.603 g, 2.63 mmol, 71%) as a colorless oil.

<sup>1</sup>H NMR (500 MHz, CDCl<sub>3</sub>) δ 9.61-9.54 (m, 1H), 4.35-4.18 (m, 1H), 4.12-4.02 (m, 2H), 1.65-1.41 (m, 15H).

### Methyl (((9*H*-fluoren-9-yl)methoxy)carbonyl)-L-serinate (2b)

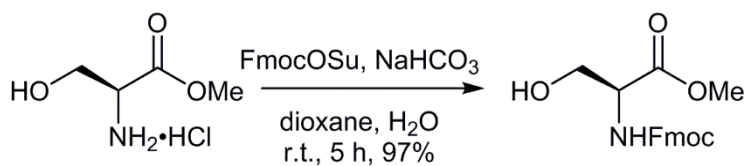

START

RR2-RF1

STIR-RF1

RR3-RF1

RR1-RF1

RR4-RR1-RF1

WAIT(Min) (Wait 300 min)

RS2-RF1

WAIT(Min) (Wait 3 min)

STIROFF-RF1

RS1-RF1

SEP-RF1 (UP)

SF1-RF1

RS1-RF1

SEP-RF1(UP)

SF2-SF

RS3-RF1

SEP-RF1(UP)

SF2-DT2-CF1

END

The reagents, washings and solvents were placed in each reservoirs and bottles as described below.

RF1 methyl L-serinate hydrochloride (1.00 g, 6.31 mmol)

RR1 Fmoc-OSu (2.55 g, 7.57 mmol) in 15.0 mL of dioxane

RR2 dioxane (5.00 mL)

RR3 NaHCO<sub>3</sub> (1.59 g, 18.9 mmol) in 25.2 mL of H<sub>2</sub>O

RR4 dioxane 4.20 mL

RS1 EtOAc 120 mL

RS2 HCl (1 M aqueous) 60.0 mL

RS3 NaCl (10% aqueous) 80.0 mL

DT2 Na<sub>2</sub>SO<sub>4</sub>

To a solution of methyl L-serinate hydrochloride (1.00 g, 6.31 mmol, 1.00 equiv., RF1) in dioxane (5.00 mL, RR2) were added NaHCO<sub>3</sub> (1.59 g, 18.9 mmol, 3.00

equiv, RR3) in H<sub>2</sub>O (25.2 mL, RR3) and Fmoc-OSu (2.55 g, 7.57 mmol, 1.20 equiv, RR1) in dioxane (15.0 mL, RR1) diluted with dioxane (4.20 mL, RR4) and transferred to RF1 at 25 °C. After being stirred at the same temperature for 5 h, the reaction mixture (RF1) was quenched with 1 M HCl aq. (RS2) and the aqueous layer was extracted with two portions of ethyl acetate (RS1). The combined organic layer was washed with 10% NaCl aq. (RS3), dried over Na<sub>2</sub>SO<sub>4</sub> (DT2), filtered, and concentrated in vacuo. The residue was purified by column chromatography on silica gel (50% ethyl acetate in hexane) to give methyl (((9*H*-fluoren-9-yl)methoxy)carbonyl)-L-serinate (2.08 g, 6.09 mmol, 97%) as a colorless oil.

<sup>1</sup>H NMR (500 MHz, CDCl<sub>3</sub>) δ 7.78-7.61 (m, 4H), 7.43-7.31 (m, 4H), 5.67 (d, *J* = 7.0 Hz, 1H), 4.44-4.43 (m, 3H), 4.24 (t, *J* = 6.5 Hz, 1H), 4.02-3.94 (m, 2H), 3.80 (s, 3H), 2.05 (t, *J* = 6.0 Hz, 1 H).

### 3-((9*H*-Fluoren-9-yl)methyl) 4-methyl (*S*)-2,2-dimethyloxazolidine-3,4-dicarboxylate (3b)

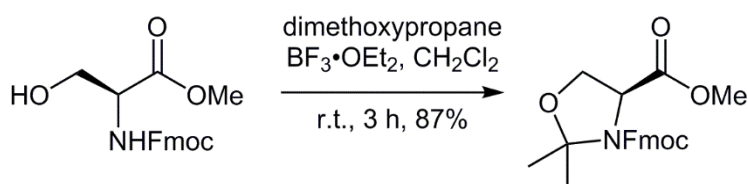

START

STIR-RF1

RR1-RF1

RR4-RR1-RF1

RR3-RF1

RR6-RR3-RF1

WAIT(Min) (Wait 360 min)

STIROFF-RF1

RF1-SF

SF-SF2

RR2-RF1

SF2-RF1

STIR-RF1

WAIT(Min) (Wait 5 min)

STIROFF-RF1

RS1-RF1

SEP-RF1(UP)

SF1-RF1

RS1-RF1

SEP-RF1(UP)

SF2-SF

RS3-RF1

SEP-RF1(UP)

SF2-DT2-CF1

END

The reagents, washings and solvents were placed in each reservoirs and bottles as described below.

RF1 methyl (((9*H*-fluoren-9-yl)methoxy)carbonyl)-L-serinate (1.00 g, 2.93 mmol) in 15.6 mL of CH<sub>2</sub>Cl<sub>2</sub>

RR1 2,2-dimethoxypropane (1.08 mL, 8.79 mmol) in 5.00 mL of CH<sub>2</sub>Cl<sub>2</sub>

RR2 NaOH (10% aqueous) 40.0 mL

RR3 BF<sub>3</sub>·OEt<sub>2</sub> (0.0368 mL, 0.293 mmol) in 15.0 mL of CH<sub>2</sub>Cl<sub>2</sub>

RR4 CH<sub>2</sub>Cl<sub>2</sub> 5.00 mL

RR6 CH<sub>2</sub>Cl<sub>2</sub> 5.00 mL

RS1 EtOAc 160 mL

RS3 NaCl (10% aqueous) 80.0 mL

DT2 Na<sub>2</sub>SO<sub>4</sub>

To a solution of methyl (((9*H*-fluoren-9-yl)methoxy)carbonyl)-L-serinate (**2b**, 1.00 g, 2.93 mmol, 1.00 equiv, RF1) in CH<sub>2</sub>Cl<sub>2</sub> (15.6 mL, RF1) were added 2,2-dimethoxypropane (1.08 mL, 8.79 mmol, 3.00 equiv, RR1) in CH<sub>2</sub>Cl<sub>2</sub> (5.00 mL, RR1) diluted with CH<sub>2</sub>Cl<sub>2</sub> (5.00 mL, RR4) and boron trifluoride-ethyl ether complex (0.0368 mL, 0.293 mmol, 0.100 equiv., RR3) in CH<sub>2</sub>Cl<sub>2</sub> (15.0 mL, RR3) diluted with CH<sub>2</sub>Cl<sub>2</sub> (5.00 mL, RR6) and transferred to RF1 at 25 °C. After being stirred at the same temperature for 3 h, the reaction mixture (RF1) was quenched with saturated NaOH aq. (RR2) and the aqueous layer was extracted with two portions of ethyl acetate (RS1). The combined organic layer was washed with 10% NaCl aq. (RS3), dried over Na<sub>2</sub>SO<sub>4</sub> (DT2), filtered, and concentrated in vacuo. The residue was purified by column chromatography on silica gel (25% ethyl acetate in hexane) to give 3-(*tert*-butyl) 3-((9*H*-fluoren-9-yl)methyl) 4-methyl (*S*)-2,2-dimethyloxazolidine-3,4-dicarboxylate (0.977 g, 2.56 mmol, 87%) as a colorless oil.

$^1\text{H}$  NMR (500 MHz,  $\text{CDCl}_3$ )  $\delta$  7.74-7.53 (m, 4H), 7.39-7.30 (m, 4H), 4.72 (t,  $J = 4.5$  Hz, 1H), 4.47-4.07 (m, 5H), 3.65 (s, 3H), 1.73 (s, 3H), 1.53 (s, 3H).

**(9*H*-Fluoren-9-yl)methyl (S)-4-formyl-2,2-dimethyloxazolidine-3-carboxylate (4b)**

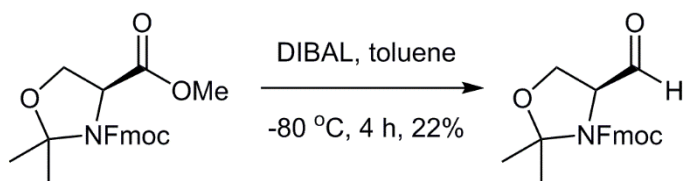

START

STIR-RF1

RR2-RF1

WAIT(Min) (Wait 240 min)

RS2-RF1

RS1-RF1

WAIT(Min) (Wait 60 min)

STIROFF-RF1

SEP-RF1(UP)

SF1-RF1

RS1-RF1

SEP-RF1(UP)

SF2-SF

RS3-RF1

SEP-RF1(UP)

SF2-DT1-CF1

END

The reagents, washings and solvents were placed in each reservoirs and bottles as described below.

RF1 3-((9*H*-fluoren-9-yl)methyl) 4-methyl (*S*)-2,2-dimethyloxazolidine-3,4-dicarboxylate (1.00 g, 2.62 mmol, 1.00 equiv., RF1) in 52.4 mL of toluene

RR2 Diisobutylaluminum hydride (5.24 mL, 5.24 mmol, 2.00 equiv.)

RS1 EtOAc 160 mL

RS2 Rochelle salt (10% aqueous) 60.0 mL

RS3 NaCl (10% aqueous) 80.0 mL

DT1 Na<sub>2</sub>SO<sub>4</sub>

To a solution of 3-((9*H*-fluoren-9-yl)methyl) 4-methyl (*S*)-2,2-dimethyloxazolidine-3,4-dicarboxylate (**3b**, 1.00 g, 2.62 mmol, 1.00 equiv, RF1) in toluene (52.4 mL, RF1) were added DIBAL (5.24 mL, 5.24 mmol, 2.00 equiv, RR2) and transferred to RF1 at -80 °C. After being stirred at the same temperature for 4 h, the reaction mixture was quenched with saturated aqueous Rochelle salt and the aqueous layer (RS2) at 25 °C. After being stirred at the same temperature for 1 h, the reaction mixture was extracted with two portions of ethyl acetate (RS1). The combined organic layer was washed with 10% NaCl aq. (RS3), dried over Na<sub>2</sub>SO<sub>4</sub> (DT1), filtered, and concentrated in vacuo. The residue was purified by column chromatography on silica gel (25% ethyl acetate in hexane) to give (9*H*-fluoren-9-yl)methyl (*S*)-4-formyl-2,2-dimethyloxazolidine-3-carboxylate (0.206 g, 0.586 mmol, 22%) as a colorless oil.

$^1\text{H}$  NMR (500 MHz,  $\text{CDCl}_3$ )  $\delta$  9.14 (s, 1H) 7.71-7.51 (m, 4H), 7.41-7.31 (m, 4H), 4.80 (m, 1H), 4.62-3.89 (m, 5H), 1.60 (s, 3H), 1.49 (s, 3H).

**Methyl ((benzyloxy)carbonyl)-L-serinate (2c)**

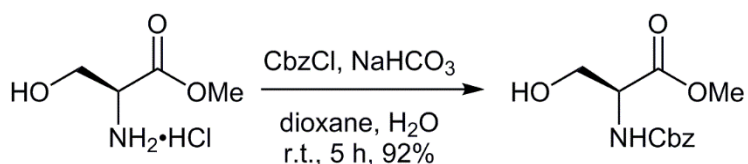

START

RR2-RF1

STIR-RF1

RR3-RF1

RR1-RF1

RR4-RR1-RF1

WAIT(Min) (Wait 300 min)

RS2-RF1

WAIT(Min) (Wait 3 min)

STIROFF-RF1

RS1-RF1

SEP-RF1 (UP)

SF1-RF1

RS1-RF1

SEP-RF1(UP)

SF2-SF

RS3-RF1



SEP-RF1(UP)

SF2-DT2-CF1

END

The reagents, washings and solvents were placed in each reservoirs and bottles as described below.

RF1 methyl L-serinate hydrochloride (1.00 g, 6.43 mmol)

RR1 Cbz-Cl (1.10 mL, 7.72 mmol) in 15.0 mL of dioxane

RR2 dioxane (5.00 mL)

RR3 NaHCO<sub>3</sub> (1.62 g, 19.3 mmol) in 25.7 mL of H<sub>2</sub>O

RR4 dioxane 4.20 mL

RS1 EtOAc 120 mL

RS2 HCl (1 M aqueous) 60.0 mL

RS3 NaCl (10% aqueous) 80.0 mL

DT2 Na<sub>2</sub>SO<sub>4</sub>

To a solution of methyl L-serinate hydrochloride (**1**, 1.00 g, 6.43 mmol, 1.00 equiv, RF1) in dioxane (5.00 mL, RR2) were added NaHCO<sub>3</sub> (1.62 g, 19.3 mmol, 3.00 equiv, RR3) in H<sub>2</sub>O (25.7 mL, RR3) and Cbz-Cl (1.10 mL, 7.72 mmol, 1.20 equiv, RR1) in dioxane (15.0 mL, RR1) diluted with dioxane (4.20 mL, RR4) and transferred to RF1 at 25 °C. After being stirred at the same temperature for 5 h, the reaction mixture (RF1) was quenched with 1 M HCl aq. (RS2) and the aqueous layer was extracted with two portions of ethyl acetate (RS1). The combined organic layer was washed with 10% NaCl aq. (RS3), dried over Na<sub>2</sub>SO<sub>4</sub> (DT2), filtered, and concentrated in vacuo. The residue was

purified by column chromatography on silica gel (50% ethyl acetate in hexane) to give methyl ((benzyloxy)carbonyl)-L-serinate (1.50 g, 5.92 mmol, 92%) as a colorless oil.

$^1\text{H}$  NMR (500 MHz,  $\text{CDCl}_3$ )  $\delta$  7.37-7.31 (m, 5H), 5.74 (s, 1H), 5.12 (s, 2H), 4.45 (t,  $J = 7.5$  Hz, 1H), 4.01-3.91 (m, 2H), 3.78 (s, 3H), 2.34 (s, 1H).

### 3-benzyl 4-methyl (S)-2,2-dimethyloxazolidine-3,4-dicarboxylate (3c)

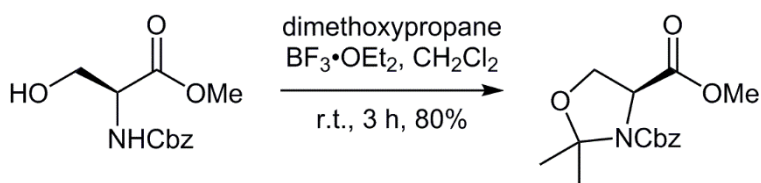

START

STIR-RF1

RR1-RF1

RR4-RR1-RF1

RR3-RF1

RR6-RR3-RF1

WAIT(Min) (Wait 360 min)

STIROFF-RF1

RF1-SF

SF-SF2

RR2-RF1

SF2-RF1

STIR-RF1

WAIT(Min) (Wait 5 min)

STIROFF-RF1

RS1-RF1

SEP-RF1(UP)

SF1-RF1

RS1-RF1

SEP-RF1(UP)

SF2-SF

RS3-RF1

SEP-RF1(UP)

SF2-DT2-CF1

END

The reagents, washings and solvents were placed in each reservoirs and bottles as described below.

RF1 methyl ((benzyloxy)carbonyl)-L-serinate (7.00 g, 27.6 mmol) in 30.0 mL of  $\text{CH}_2\text{Cl}_2$

RR1 2,2-dimethoxypropane (10.1 mL, 82.8 mmol) in 10.0 mL of  $\text{CH}_2\text{Cl}_2$

RR2 NaOH (10% aqueous) 40.0 mL

RR3  $\text{BF}_3 \cdot \text{OEt}_2$  (0.347 mL, 2.76 mmol) in 5.00 mL of  $\text{CH}_2\text{Cl}_2$

RR4  $\text{CH}_2\text{Cl}_2$  5.00 mL

RR6  $\text{CH}_2\text{Cl}_2$  5.00 mL

RS1 EtOAc 160 mL

RS3 NaCl (10% aqueous) 80.0 mL

DT2  $\text{Na}_2\text{SO}_4$

To a solution of methyl ((benzyloxy)carbonyl)-L-serinate (7.00 g, 27.6 mmol, 1.00 equiv, RF1) in CH<sub>2</sub>Cl<sub>2</sub> (30.0 mL, RF1) were added 2,2-dimethoxypropane (10.1 mL, 82.8 mmol, 3.00 equiv, RR1) in CH<sub>2</sub>Cl<sub>2</sub> (10.0 mL, RR1) diluted with CH<sub>2</sub>Cl<sub>2</sub> (5.00 mL, RR4) and boron trifluoride-ethyl ether complex (0.347 mL, 2.76 mmol, 0.100 equiv, RR3) in CH<sub>2</sub>Cl<sub>2</sub> (5.00 mL, RR3) diluted with CH<sub>2</sub>Cl<sub>2</sub> (5.00 mL, RR6) and transferred to RF1 at 25 °C. After being stirred at the same temperature for 3 h, the reaction mixture (RF1) was quenched with saturated NaOH aq. (RR2) and the aqueous layer was extracted with two portions of ethyl acetate (RS1). The combined organic layer was washed with 10% NaCl aq. (RS3), dried over Na<sub>2</sub>SO<sub>4</sub> (DT2), filtered, and concentrated in vacuo. The residue was purified by column chromatography on silica gel (16% ethyl acetate in hexane) to give 3-benzyl 4-methyl (S)-2,2-dimethyloxazolidine-3,4-dicarboxylate (6.44 g, 22.0 mmol, 80%) as a colorless oil.

<sup>1</sup>H NMR (500 MHz, CDCl<sub>3</sub>) δ 7.37-7.30 (m, 5H), 5.23-5.03 (m, 2H), 4.55-4.47 (m, 2H), 4.18-4.08 (m, 1H), 3.64 (s, 3H), 1.71 (s, 3H), 1.56 (s, 3H).

#### **Benzyl (S)-4-formyl-2,2-dimethyloxazolidine-3-carboxylate (4c)**

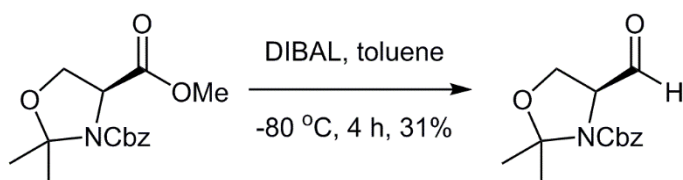

START

STIR-RF1

RR2-RF1

WAIT(Min) (Wait 240 min)

RS2-RF1

RS1-RF1

WAIT(Min) (Wait 60 min)

STIROFF-RF1

SEP-RF1(UP)

SF1-RF1

RS1-RF1

SEP-RF1(UP)

SF2-SF

RS3-RF1

SEP-RF1(UP)

SF2-DT1-CF1

END

The reagents, washings and solvents were placed in each reservoirs and bottles as described below.

RF1 3-benzyl 4-methyl (S)-2,2-dimethyloxazolidine-3,4-dicarboxylate (1.00 g, 3.41 mmol, 1.00 equiv., RF1) in 40.0 mL of toluene

RR2 Diisobutylaluminum Hydride (6.82 mL, 6.82 mmol, 2.00 equiv.)

RS1 EtOAc 160 mL

RS2 Rochelle salt (10% aqueous) 60.0 mL

RS3 NaCl (10% aqueous) 80.0 mL

DT1 Na<sub>2</sub>SO<sub>4</sub>

To a solution of 3-benzyl 4-methyl (S)-2,2-dimethyloxazolidine-3,4-dicarboxylate (**3c**, 1.00 g, 3.41 mmol, 1.00 equiv, RF1) in toluene (40.0 mL, RF1) were added DIBAL (6.82 mL, 6.82 mmol, 2.00 equiv, RR2) and transferred to RF1 at -80 °C. After being stirred at the same temperature for 4 h, the reaction mixture was quenched with saturated aqueous Rochelle salt and the aqueous layer (RS2) at 25 °C. After being stirred at the same temperature for 1 h, the reaction mixture was extracted with two portions of ethyl acetate (RS1). The combined organic layer was washed with 10% NaCl aq. (RS3), dried over Na<sub>2</sub>SO<sub>4</sub> (DT1), filtered, and concentrated in vacuo. The residue was purified by column chromatography on silica gel (25% ethyl acetate in hexane) to give benzyl (S)-4-formyl-2,2-dimethyloxazolidine-3-carboxylate (0.276 g, 1.05 mmol, 31%) as a colorless oil.

<sup>1</sup>H NMR (500 MHz, CDCl<sub>3</sub>) δ 9.53 (s, 1H) 7.36-7.28 (m, 5H), 5.22-5.01 (m, 2H), 4.41-4.31 (m, 2H), 4.12-4.02 (m, 1H), 1.66 (s, 3H), 1.56 (s, 3H).
